# Supplementary material for: The antibacterial activity of polyoxometalates: structures, antibiotic effects and future perspectives
Source: Royal Society of Chemistry journal article supplement (doi:10.1039/c7cc07549a), 2018-01-01
Supplement: c7cc07549a1.pdf [file c7cc07549a1.pdf]

## Supplementary Information

### The antibacterial activity of polyoxometalates: Structures, antibiotic effects and future perspectives

Aleksandar Bijelic,<sup>a</sup> Manuel Aureliano<sup>b</sup> and Annette Rompel<sup>a\*</sup>

<sup>a</sup> Universität Wien, Fakultät für Chemie, Institut für Biophysikalische Chemie, Althanstraße 14, 1090 Wien, Austria; [www.bpc.univie.ac.at](http://www.bpc.univie.ac.at), correspondence to:[annette.rompel@univie.ac.at](mailto:annette.rompel@univie.ac.at).

<sup>b</sup> CCMar, FCT, Faculdade de Ciências e Tecnologia, Universidade do Algarve, 8000-139 Faro, Portugal.

### Content

|                                                        |    |
|--------------------------------------------------------|----|
| 1. Minimum inhibitory concentration (MIC) Tables ..... | 2  |
| 2. Figures .....                                       | 7  |
| 3. Structure-activity graphs .....                     | 7  |
| 4. References .....                                    | 14 |

# 1. Minimum inhibitory concentration (MIC) Tables

Please note that some POMs, which were investigated with regard to their antibacterial activity, are missing in the provided tables due to various reasons but mostly due to missing information in the respective publication. Furthermore, if reported by the authors, the fractional inhibitory concentration (FIC) index is provided for the POMs/POM-hybrids that exhibited/enhanced antibacterial activity in synergy with conventional antibiotics. The FIC index describes the synergy between two drugs based on the MIC of each drug in combination and when used alone.

**Table S1** Antibacterial effect of POMs alone (MIC) and in combination with oxacillin (FIC) against MRSA strains SR3605 and ATCC43300.

| POM                                                                                                                                  | MIC (µg/ml)           |                          | FIC <sup>[a]</sup>    |                          | Ref. |
|--------------------------------------------------------------------------------------------------------------------------------------|-----------------------|--------------------------|-----------------------|--------------------------|------|
|                                                                                                                                      | SR3605 <sup>[b]</sup> | ATCC43300 <sup>[c]</sup> | SR3605 <sup>[b]</sup> | ATCC43300 <sup>[c]</sup> |      |
| <b>Polyoxotungstate:</b>                                                                                                             |                       |                          |                       |                          |      |
| <b>Keggin:</b>                                                                                                                       |                       |                          |                       |                          |      |
| Na <sub>3</sub> [PW <sub>12</sub> O <sub>40</sub> ]                                                                                  | 3200                  | 3200                     | 0.156                 | 0.062                    | 1    |
| Na <sub>4</sub> [SiW <sub>12</sub> O <sub>40</sub> ]                                                                                 | 3200                  | 3200                     | 0.094                 | 0.019                    | 1    |
| K <sub>5</sub> [BW <sub>12</sub> O <sub>40</sub> ]                                                                                   | 800                   | 800                      | 0.156                 | 0.094                    | 1    |
| K <sub>7</sub> [PTi <sub>2</sub> W <sub>10</sub> O <sub>40</sub> ]                                                                   | 12800                 | 3200                     | 0.047                 | 0.063                    | 1,2  |
| (Pr' <sup>2</sup> NH <sub>3</sub> ) <sub>6</sub> H[PTi <sub>2</sub> W <sub>10</sub> O <sub>38</sub> (O <sub>2</sub> ) <sub>2</sub> ] | 6400                  | 3200                     | 0.094                 | 0.094                    | 2    |
| (Pr' <sup>2</sup> NH <sub>2</sub> ) <sub>5</sub> [PTiW <sub>11</sub> O <sub>40</sub> ]                                               | 12800                 | 3200                     | 0.039                 | 0.031                    | 2    |
| (Pr' <sup>2</sup> NH <sub>2</sub> ) <sub>5</sub> [PTiW <sub>11</sub> O <sub>39</sub> (O <sub>2</sub> )]                              | 3200                  | 1600                     | 0.039                 | 0.023                    | 2    |
| K <sub>4</sub> [GeW <sub>12</sub> O <sub>40</sub> ]                                                                                  | 1600                  | 800                      | 0.188                 | 0.133                    | 2    |
| K <sub>6</sub> [CoW <sub>12</sub> O <sub>40</sub> ]                                                                                  | 3200                  | 1600                     | 0.078                 | 0.094                    | 1    |
| K <sub>6</sub> [H <sub>2</sub> SiNiW <sub>11</sub> O <sub>40</sub> ]                                                                 | 6400                  | 3200                     | 0.078                 | 0.012                    | 2    |
| <b>Lacunary Keggin:</b>                                                                                                              |                       |                          |                       |                          |      |
| α-K <sub>7</sub> [PW <sub>11</sub> O <sub>39</sub> ]                                                                                 | 12800                 | 6400                     | 0.063                 | 0.035                    | 1    |
| α-[SiW <sub>11</sub> O <sub>39</sub> ] <sup>8-</sup>                                                                                 | 2000                  | 2000                     | 0.041                 | 0.033                    | 3    |
| α-[SiW <sub>11</sub> O <sub>39</sub> Co] <sup>6-</sup>                                                                               | 2000                  | 2000                     | 0.033                 | 0.029                    | 3    |
| B-α-Na <sub>9</sub> [PW <sub>9</sub> O <sub>34</sub> ]                                                                               | 12800                 | 12800                    | 0.047                 | 0.031                    | 1    |
| A-β-Na <sub>8</sub> [PW <sub>9</sub> O <sub>34</sub> ]                                                                               | 12800                 | 6400                     | 0.047                 | 0.047                    | 1    |
| A-β-Na <sub>9</sub> [HSiW <sub>9</sub> O <sub>34</sub> ]                                                                             | 12800                 | 6400                     | 0.094                 | 0.018                    | 2    |
| A-α-Na <sub>10</sub> [SiW <sub>9</sub> O <sub>34</sub> ]                                                                             | 12800                 | 12800                    | 0.156                 | 0.010                    | 1    |
| B-α-Na <sub>9</sub> [SbW <sub>9</sub> O <sub>33</sub> ]                                                                              | 3200                  | 1600                     | 0.156                 | 0.156                    | 1    |
| <b>Double Keggin:</b>                                                                                                                |                       |                          |                       |                          |      |
| K <sub>9</sub> H <sub>5</sub> [Ge <sub>2</sub> Ti <sub>6</sub> W <sub>18</sub> O <sub>77</sub> ]                                     | 50                    | 10                       | 0.133                 | 0.039                    | 2    |
|                                                                                                                                      | 50                    | 25                       | 0.141                 | 0.047                    |      |
| K <sub>2</sub> Eu <sub>3</sub> H <sub>3</sub> [Ge <sub>2</sub> Ti <sub>6</sub> W <sub>18</sub> O <sub>77</sub> ]                     |                       |                          |                       |                          |      |
| (TBA) <sub>7.5</sub> H <sub>6.5</sub> [Si <sub>2</sub> Ti <sub>6</sub> W <sub>18</sub> O <sub>77</sub> ]                             | 200                   | 100                      | 0.070                 | 0.047                    | 2    |
| (Me <sub>3</sub> NH) <sub>8</sub> [Si <sub>2</sub> Nb <sub>6</sub> W <sub>18</sub> O <sub>77</sub> ]                                 | 100                   | 25                       | 0.063                 | 0.031                    | 2    |
| <b>Keggin sandwich:</b>                                                                                                              |                       |                          |                       |                          |      |
| K <sub>13</sub> [Eu(SiW <sub>11</sub> O <sub>39</sub> ) <sub>2</sub> ]                                                               | 800                   | 400                      | 0.156                 | 0.012                    | 2    |
| K <sub>13</sub> [Gd(SiW <sub>11</sub> O <sub>39</sub> ) <sub>2</sub> ]                                                               | 800                   | 400                      | 0.188                 | 0.020                    | 2    |
| K <sub>10</sub> [Zn <sub>4</sub> (H <sub>2</sub> O) <sub>2</sub> (PW <sub>9</sub> O <sub>34</sub> ) <sub>2</sub> ]                   | 400                   | 400                      | 0.078                 | 0.047                    | 2    |
| K <sub>10</sub> [Co <sub>4</sub> (H <sub>2</sub> O) <sub>2</sub> (PW <sub>9</sub> O <sub>34</sub> ) <sub>2</sub> ]                   | 800                   | 400                      | 0.016                 | 0.020                    | 2    |
| K <sub>12</sub> [Cu <sub>3</sub> (PW <sub>9</sub> O <sub>34</sub> ) <sub>2</sub> ]                                                   | 400                   | 200                      | 0.141                 | 0.070                    | 2    |
| <b>Wells-Dawson:</b>                                                                                                                 |                       |                          |                       |                          |      |
| K <sub>6</sub> [P <sub>2</sub> W <sub>18</sub> O <sub>62</sub> ]                                                                     | 200                   | 100-200                  | 0.070                 | 0.023                    | 2    |
| Na <sub>9</sub> [P <sub>2</sub> Nb <sub>3</sub> W <sub>15</sub> O <sub>62</sub> ]                                                    | 800                   | 800                      | 0.141                 | 0.023                    | 2    |
| <b>Lacunary Wells-Dawson:</b>                                                                                                        |                       |                          |                       |                          |      |
| Na <sub>12</sub> [P <sub>2</sub> W <sub>15</sub> O <sub>56</sub> ]                                                                   | 200                   | 100                      | 0.133                 | 0.039                    | 2    |
| K <sub>10</sub> [P <sub>2</sub> W <sub>17</sub> O <sub>61</sub> ]                                                                    | 200                   | 100                      | 0.141                 | 0.063                    | 2    |
| <b>Decatungstate:</b>                                                                                                                |                       |                          |                       |                          |      |
| Na <sub>9</sub> [EuW <sub>10</sub> O <sub>36</sub> ]                                                                                 | 3200                  | 1600                     | 0.188                 | 0.313                    | 1    |
| K <sub>6</sub> [GdW <sub>10</sub> O <sub>36</sub> ]                                                                                  | 3200                  | 1600                     | 0.313                 | 0.281                    | 1    |
| Na <sub>8</sub> [CeW <sub>10</sub> O <sub>36</sub> ]                                                                                 | 3200                  | 1600                     | 0.313                 | 0.313                    | 1    |
| <b>Anderson-Evans:</b>                                                                                                               |                       |                          |                       |                          |      |
| K <sub>5.5</sub> H <sub>1.5</sub> [SbW <sub>6</sub> O <sub>24</sub> ]                                                                | 12800                 | 12800                    | 0.156                 | 0.063                    | 1    |
| K <sub>6</sub> Na <sub>2</sub> [MnW <sub>6</sub> O <sub>24</sub> ]                                                                   | 6400                  | 3200                     | 0.281                 | 0.281                    | 1    |
| Na <sub>3</sub> H <sub>6</sub> [CrMo <sub>6</sub> O <sub>24</sub> ]                                                                  | 1600                  | 800                      | 1.03                  | 0.50                     | 2    |

|                                                                                                                                                                        |                   |            |        |        |   |
|------------------------------------------------------------------------------------------------------------------------------------------------------------------------|-------------------|------------|--------|--------|---|
| Na <sub>3</sub> H <sub>6</sub> [CoMo <sub>6</sub> O <sub>24</sub> ]                                                                                                    | 1600              | 800        | 1.03   | 0.50   | 2 |
| <b>Other structure:</b>                                                                                                                                                |                   |            |        |        |   |
| Na <sub>27</sub> [NaAs <sub>4</sub> W <sub>40</sub> O <sub>140</sub> ]                                                                                                 | 400               | 400        | 0.281  | 0.156  | 1 |
| K <sub>18</sub> [KSb <sub>9</sub> W <sub>21</sub> O <sub>86</sub> ]                                                                                                    | 200               | 400        | 0.313  | 0.281  | 1 |
| Na <sub>10</sub> [H <sub>2</sub> W <sub>12</sub> O <sub>42</sub> ]                                                                                                     | 51200             | 25600      | 0.375  | 0.094  | 2 |
| K <sub>15</sub> H <sub>3</sub> [Pr <sub>3</sub> (H <sub>2</sub> O) <sub>3</sub> (SbW <sub>9</sub> O <sub>33</sub> )(W <sub>5</sub> O <sub>18</sub> ) <sub>3</sub> ]    | 3200              | 1600       | 0.156  | 0.188  | 2 |
| K <sub>15</sub> H <sub>3</sub> [Eu <sub>3</sub> (H <sub>2</sub> O) <sub>3</sub> (SbW <sub>9</sub> O <sub>33</sub> )(W <sub>5</sub> O <sub>18</sub> ) <sub>3</sub> ]    | 3200              | 800        | 0.156  | 0.250  | 2 |
| K <sub>15</sub> H <sub>3</sub> [Ce <sub>3</sub> (H <sub>2</sub> O) <sub>3</sub> (SbW <sub>9</sub> O <sub>33</sub> )(W <sub>5</sub> O <sub>18</sub> ) <sub>3</sub> ]    | 3200              | 1600       | 0.156  | 0.188  | 2 |
| (NH <sub>4</sub> ) <sub>8</sub> [H <sub>2</sub> Co <sub>2</sub> W <sub>11</sub> O <sub>40</sub> ]                                                                      | 1600              | 800        | 0.188  | 0.094  | 2 |
| Cs <sub>6</sub> [P <sub>2</sub> W <sub>5</sub> O <sub>23</sub> ]                                                                                                       | 3200              | 800        | 0.141  | 0.063  | 2 |
| <b>Polyoxovanadotungstate:</b>                                                                                                                                         |                   |            |        |        |   |
| <b>Keggin:</b>                                                                                                                                                         |                   |            |        |        |   |
| K <sub>5</sub> [PVW <sub>11</sub> O <sub>40</sub> ]                                                                                                                    | 800               | 400        | 0.156  | 0.094  | 2 |
| K <sub>4</sub> [PVW <sub>11</sub> O <sub>40</sub> ]                                                                                                                    | 700-800           | 400        | 0.281  | 0.047  | 2 |
| K <sub>5</sub> [PV <sub>2</sub> W <sub>10</sub> O <sub>40</sub> ]                                                                                                      | 3200              | 1600       | 0.156  | 0.063  | 2 |
| K <sub>5</sub> [SiVW <sub>11</sub> O <sub>40</sub> ]                                                                                                                   | 3200              | 800        | 0.125  | 0.031  | 1 |
| K <sub>6</sub> [BVW <sub>11</sub> O <sub>40</sub> ]                                                                                                                    | 800               | 200        | 0.094  | 0.156  | 1 |
| K <sub>7</sub> [BVW <sub>11</sub> O <sub>40</sub> ]                                                                                                                    | 12800             | 3200       | 0.063  | 0.063  | 1 |
| K <sub>6</sub> [PV <sub>3</sub> W <sub>9</sub> O <sub>40</sub> ]                                                                                                       | 3200              | 1600       | 0.094  | 0.094  | 1 |
| K <sub>6</sub> H[SiV <sub>3</sub> W <sub>9</sub> O <sub>40</sub> ]                                                                                                     | 6400              | 1600       | 0.125  | 0.020  | 2 |
| <b>Lindqvist:</b>                                                                                                                                                      |                   |            |        |        |   |
| (MeH <sub>3</sub> ) <sub>4</sub> [VW <sub>5</sub> O <sub>19</sub> ]                                                                                                    | 1600              | 800        | 0.375  | 0.313  | 2 |
| <b>Polyoxomolybdotungstate:</b>                                                                                                                                        |                   |            |        |        |   |
| <b>Keggin:</b>                                                                                                                                                         |                   |            |        |        |   |
| K <sub>3</sub> [PMo <sub>3</sub> W <sub>9</sub> O <sub>40</sub> ]                                                                                                      | 3200              | 1600       | 0.125  | 0.094  | 2 |
| K <sub>3</sub> [PMo <sub>9</sub> W <sub>3</sub> O <sub>40</sub> ]                                                                                                      | 25600             | 6400       | 0.500  | 0.281  | 2 |
| <b>Polyoxomolybdate:</b>                                                                                                                                               |                   |            |        |        |   |
| <b>Keggin:</b>                                                                                                                                                         |                   |            |        |        |   |
| (NH <sub>4</sub> ) <sub>6</sub> H[PMo <sub>11</sub> ZnO <sub>40</sub> ]                                                                                                | 3200              | 3200       | 0.501  | 0.141  | 2 |
| <b>Octamolybdate:</b>                                                                                                                                                  |                   |            |        |        |   |
| Na <sub>2</sub> [Mo <sub>8</sub> O <sub>26</sub> (L-lys) <sub>2</sub> ]                                                                                                | 1600              | 1600       | 1.03   | 1.03   | 2 |
| Na <sub>2</sub> [Mo <sub>8</sub> O <sub>26</sub> (DL-ala) <sub>2</sub> ]                                                                                               | 1600              | 1600       | 1.03   | 1.03   | 2 |
| Na <sub>2</sub> [Mo <sub>8</sub> O <sub>26</sub> (gly) <sub>2</sub> ]                                                                                                  | 1600              | 1600       | 1.03   | 1.03   | 2 |
| <b>Other structures:</b>                                                                                                                                               |                   |            |        |        |   |
| Na <sub>2</sub> [(Hamp) <sub>2</sub> Mo <sub>5</sub> O <sub>15</sub> ]                                                                                                 | 3200              | 3200       | 0.50   | 1.03   | 2 |
| Na <sub>6</sub> [P <sub>2</sub> Mo <sub>5</sub> O <sub>23</sub> ]                                                                                                      | 6400              | 6400       | 0.50   | 0.188  | 2 |
| (NH <sub>4</sub> ) <sub>6</sub> [MnMo <sub>9</sub> O <sub>32</sub> ]                                                                                                   | 1600              | 800        | 1.01   | 0.75   | 2 |
| (NH <sub>4</sub> ) <sub>12</sub> H <sub>2</sub> [Eu <sub>4</sub> (MoO <sub>4</sub> )(H <sub>2</sub> O) <sub>16</sub> (Mo <sub>7</sub> O <sub>24</sub> ) <sub>4</sub> ] | >400              | >400       | <0.562 | <0.562 | 2 |
| (NH <sub>4</sub> ) <sub>12</sub> H <sub>2</sub> [Gd <sub>4</sub> (MoO <sub>4</sub> )(H <sub>2</sub> O) <sub>16</sub> (Mo <sub>7</sub> O <sub>24</sub> ) <sub>4</sub> ] | >400              | >400       | <0.562 | <0.562 | 2 |
| <b>Polyoxovanadomolybdate:</b>                                                                                                                                         |                   |            |        |        |   |
| Na <sub>6</sub> [Mo <sub>6</sub> V <sub>2</sub> O <sub>26</sub> ]                                                                                                      | 3200              | 1600       | 1.03   | 1.00   | 2 |
| K <sub>5</sub> Na[HM <sub>9</sub> V <sub>3</sub> O <sub>38</sub> ]                                                                                                     | 3200              | 1600       | 1.03   | 1.00   | 2 |
| <b>Polyoxovanadate:</b>                                                                                                                                                |                   |            |        |        |   |
| <b>Decavanadate:</b>                                                                                                                                                   |                   |            |        |        |   |
| (NH <sub>4</sub> ) <sub>6</sub> [V <sub>10</sub> O <sub>28</sub> ]                                                                                                     | 50 <sup>[d]</sup> | -          | -      | -      | 4 |
| <b>Metavanadate:</b>                                                                                                                                                   |                   |            |        |        |   |
| (TBA) <sub>4</sub> [V <sub>4</sub> O <sub>12</sub> ]                                                                                                                   | 8000-16000        | 8000-16000 | -      | -      | 5 |
| <b>Other structure:</b>                                                                                                                                                |                   |            |        |        |   |
| K <sub>7</sub> [NiV <sub>13</sub> O <sub>38</sub> ]                                                                                                                    | 1000-2000         | 1000-2000  | -      | -      | 5 |
| K <sub>10</sub> H <sub>2</sub> [V <sub>18</sub> O <sub>42</sub> (H <sub>2</sub> O)]                                                                                    | 1600              | 800        | 1.03   | 1.03   | 2 |
| Na <sub>4</sub> H <sub>15</sub> [V <sub>12</sub> B <sub>32</sub> O <sub>84</sub> ]                                                                                     | 800               | 800        | 1.00   | 0.75   | 2 |
| <b>Polyoxoniobates/-tantalate:</b>                                                                                                                                     |                   |            |        |        |   |
| <b>Lindqvist:</b>                                                                                                                                                      |                   |            |        |        |   |
| Na <sub>7</sub> H[Nb <sub>6</sub> O <sub>19</sub> ]                                                                                                                    | 3200              | 3200       | 1.00   | 0.094  | 2 |
| Na <sub>8</sub> [Ta <sub>6</sub> O <sub>19</sub> ]                                                                                                                     | 12800             | 51200      | 1.00   | 0.50   | 2 |

**Other structure:**

$\text{Na}_7\text{H}_{19}[(\text{Eu}_3\text{O}(\text{OH})_3(\text{OH}_2)_3)_2\text{Al}_2(\text{Nb}_6\text{O}_{19})_5]$       800      200      1.50      0.75      2

<sup>[a]</sup> Fractional inhibitory concentration (FIC) index is defined as: FIC of drug A + FIC of drug B, where FIC of drug A = MIC of drug A in combination / MIC of drug A alone and FIC of drug B = MIC of drug B in combination / MIC of drug B alone. <sup>[b]</sup> SR3605 is a constitutive methicillin-resistant *S. aureus* (MRSA) strain. <sup>[c]</sup> ATCC43300 is an inducible methicillin-resistant *S. aureus* (MRSA) strain. <sup>[d]</sup> The exact MRSA strain, on which the antibacterial activity was tested, was not defined by the authors. amp = adenosine-5'-monophosphate. Pr<sup>1</sup>NH<sub>3</sub> = isopropylammonium, Pr<sup>2</sup>NH<sub>2</sub> = diisopropylammonium, TBA = tetra-*n*-butyl ammonium, Me = methyl.

**Table S2** Antibacterial activity of POMs alone (MIC) and in combination with β-lactam antibiotics (FIC) against both MSSA strains NCTC8325 and ATCC29213 and antibacterial activity of POMs alone against VRSA strains Mu3 and Mu50.

| POM                                                                | MIC (μg/ml)              |                           |                      |                      | FIC <sup>[a]</sup>       |                           | Ref. |
|--------------------------------------------------------------------|--------------------------|---------------------------|----------------------|----------------------|--------------------------|---------------------------|------|
|                                                                    | NCTC 8325 <sup>[b]</sup> | ATCC 29213 <sup>[c]</sup> | Mu3 <sup>[d]</sup>   | Mu50 <sup>[d]</sup>  | NCTC 8325 <sup>[b]</sup> | ATCC 29213 <sup>[c]</sup> |      |
| <b>Polyoxotungstate:</b>                                           |                          |                           |                      |                      |                          |                           |      |
| <b>Keggin:</b>                                                     |                          |                           |                      |                      |                          |                           |      |
| K <sub>7</sub> [PTi <sub>2</sub> W <sub>10</sub> O <sub>40</sub> ] | -                        | -                         | 76460 <sup>[e]</sup> | 76460 <sup>[e]</sup> | -                        | -                         | 6    |
| <b>Lacunary Keggin:</b>                                            |                          |                           |                      |                      |                          |                           |      |
| α-[PW <sub>11</sub> O <sub>39</sub> ] <sup>7-</sup>                | 2000                     | 2000                      | -                    | -                    | 0.55                     | 0.55                      | 3    |
| α-[SiW <sub>11</sub> O <sub>39</sub> ] <sup>8-</sup>               | 2000                     | 2000                      | -                    | -                    | 0.53                     | 0.53                      | 3    |
| α-[SiW <sub>11</sub> O <sub>39</sub> Co] <sup>6-</sup>             | 2000                     | 2000                      | -                    | -                    | 0.30                     | 0.30                      | 3    |
| <b>Wells-Dawson:</b>                                               |                          |                           |                      |                      |                          |                           |      |
| K <sub>6</sub> [P <sub>2</sub> W <sub>18</sub> O <sub>62</sub> ]   | -                        | -                         | 1940 <sup>[e]</sup>  | 970 <sup>[e]</sup>   | -                        | -                         | 6    |
| <b>Polyoxomolybdate:</b>                                           |                          |                           |                      |                      |                          |                           |      |
| <b>Keggin:</b>                                                     |                          |                           |                      |                      |                          |                           |      |
| K <sub>4</sub> [SiMo <sub>12</sub> O <sub>40</sub> ]               | -                        | -                         | 1625 <sup>[e]</sup>  | 1625 <sup>[e]</sup>  | -                        | -                         | 6    |
| <b>Polyoxovanadate:</b>                                            |                          |                           |                      |                      |                          |                           |      |
| <b>Metavanadate:</b>                                               |                          |                           |                      |                      |                          |                           |      |
| (TBA) <sub>4</sub> [V <sub>4</sub> O <sub>12</sub> ]               | 8000                     | -                         | -                    | -                    | -                        | -                         | 5    |
| <b>Other structure:</b>                                            |                          |                           |                      |                      |                          |                           |      |
| K <sub>7</sub> [MnV <sub>13</sub> O <sub>38</sub> ]                | 500                      | -                         | -                    | -                    | -                        | -                         | 5    |

<sup>[a]</sup> Fractional inhibitory concentration (FIC) index is defined as: FIC of drug A + FIC of drug B, where FIC of drug A = MIC of drug A in combination / MIC of drug A alone and FIC of drug B = MIC of drug B in combination / MIC of drug B alone. <sup>[b]</sup> NCTC8325 is a methicillin-susceptible *S. aureus* (MSSA) strain, which is penicillinase negative. <sup>[c]</sup> ATCC29213 is a methicillin-susceptible *S. aureus* (MSSA) strain, which is penicillinase positive. <sup>[d]</sup> Mu3 and Mu50 are a vancomycin-resistant *S. aureus* (VRSA) strain with lowered susceptibility to glycopeptide antibiotics having thicker cell walls in comparison to other resistant strains (In comparison to Mu50, Mu3 has a heterogeneous vancomycin resistance pattern). <sup>[e]</sup> The MIC values were provided in μM by the authors and therefore had to be converted into μg/ml units by us applying the reported POM formula including crystal waters. TBA = tetra-*n*-butyl ammonium.

**Table S3** Antibacterial activity of POMs alone (MIC) against six strains of *S. pneumoniae*.

| POM                                                                                 | MIC <sup>[a]</sup><br>(µg/ml) | Ref. |
|-------------------------------------------------------------------------------------|-------------------------------|------|
| <b>Polyoxotungstate:</b>                                                            |                               |      |
| <b>Keggin:</b>                                                                      |                               |      |
| Na <sub>3</sub> [PW <sub>12</sub> O <sub>40</sub> ]                                 | 2000-4000                     | 5    |
| K <sub>7</sub> [PTi <sub>2</sub> W <sub>10</sub> O <sub>40</sub> ]                  | 4000-8000                     | 5    |
| <b>Decatungstate:</b>                                                               |                               |      |
| Na <sub>9</sub> [EuW <sub>10</sub> O <sub>36</sub> ]                                | 2000-4000                     | 5    |
| <b>Other structure:</b>                                                             |                               |      |
| K <sub>18</sub> [KSb <sub>9</sub> W <sub>21</sub> O <sub>86</sub> ]                 | 128-1000                      | 5    |
| <b>Polyoxovanadotungstate:</b>                                                      |                               |      |
| <b>Keggin:</b>                                                                      |                               |      |
| K <sub>5</sub> [PVW <sub>11</sub> O <sub>40</sub> ]                                 | 1000-2000                     | 5    |
| K <sub>6</sub> [BVW <sub>11</sub> O <sub>40</sub> ]                                 | 1000-4000                     | 5    |
| K <sub>7</sub> [BVW <sub>11</sub> O <sub>40</sub> ]                                 | 500-2000                      | 5    |
| K <sub>6</sub> [PV <sub>3</sub> W <sub>9</sub> O <sub>40</sub> ]                    | 2000-4000                     | 5    |
| <b>Lindqvist:</b>                                                                   |                               |      |
| (MeH <sub>3</sub> N) <sub>4</sub> [VW <sub>5</sub> O <sub>19</sub> ]                | 64-128                        | 5    |
| <b>Polyoxomolybdate:</b>                                                            |                               |      |
| <b>Keggin:</b>                                                                      |                               |      |
| Na <sub>3</sub> [PMO <sub>12</sub> O <sub>40</sub> ]                                | 2000-8000                     | 5    |
| <b>Octamolybdate:</b>                                                               |                               |      |
| (Pr <sup>i</sup> NH <sub>3</sub> ) <sub>4</sub> [Mo <sub>8</sub> O <sub>26</sub> ]  | 512-1000                      | 5    |
| <b>Heptamolybdate:</b>                                                              |                               |      |
| (NH <sub>4</sub> ) <sub>6</sub> [Mo <sub>7</sub> O <sub>24</sub> ]                  | 512-1000                      | 5    |
| <b>Polyoxovanadomolybdate:</b>                                                      |                               |      |
| Na <sub>6</sub> [Mo <sub>6</sub> V <sub>2</sub> O <sub>26</sub> ]                   | 128-256                       | 5    |
| K <sub>5</sub> Na[HMo <sub>9</sub> V <sub>3</sub> O <sub>38</sub> ]                 | 128-256                       | 5    |
| <b>Polyoxovanadate:</b>                                                             |                               |      |
| <b>Decavanadate:</b>                                                                |                               |      |
| (TBA) <sub>4</sub> [V <sub>10</sub> O <sub>28</sub> ]                               | 4-8                           | 5    |
| <b>Metavanadate:</b>                                                                |                               |      |
| (TBA) <sub>4</sub> [V <sub>4</sub> O <sub>12</sub> ]                                | 8-32                          | 5    |
| <b>Other structure:</b>                                                             |                               |      |
| K <sub>7</sub> [MnV <sub>13</sub> O <sub>38</sub> ]                                 | 8-32                          | 5    |
| K <sub>7</sub> [NiV <sub>13</sub> O <sub>38</sub> ]                                 | 8-32                          | 5    |
| K <sub>5</sub> H <sub>2</sub> [V <sub>15</sub> O <sub>36</sub> (CO <sub>3</sub> )]  | 4-16                          | 5    |
| K <sub>10</sub> H <sub>2</sub> [V <sub>18</sub> O <sub>42</sub> (H <sub>2</sub> O)] | 8-16                          | 5    |

<sup>[a]</sup> Six *S. pneumoniae* strains were tested, namely penicillin-intermediate-resistant IID553 and IID554 and penicillin-resistant BS225, BS234, BS259 and BS269. Pr<sup>i</sup>NH<sub>3</sub> = isopropylammonium, TBA = tetra-*n*-butyl ammonium, Me = methyl.

**Table S4** Antibacterial activity of POM-hybrids and nanocomposites against a series of bacterial strains.

| POM/POM-hybrid                                                                                                                                                                                                                             | MIC ( $\mu\text{g/ml}$ ) |                   |                   |                   |                    |                    |                   |                   | Ref. |
|--------------------------------------------------------------------------------------------------------------------------------------------------------------------------------------------------------------------------------------------|--------------------------|-------------------|-------------------|-------------------|--------------------|--------------------|-------------------|-------------------|------|
|                                                                                                                                                                                                                                            | SA <sup>[a]</sup>        | EC <sup>[b]</sup> | BS <sup>[c]</sup> | PA <sup>[d]</sup> | Psp <sup>[e]</sup> | Vsp <sup>[f]</sup> | PP <sup>[g]</sup> | CM <sup>[h]</sup> |      |
| <b>Polyoxovanadate:</b>                                                                                                                                                                                                                    |                          |                   |                   |                   |                    |                    |                   |                   |      |
| <b>Decavanadate:</b>                                                                                                                                                                                                                       |                          |                   |                   |                   |                    |                    |                   |                   |      |
| (NH <sub>4</sub> ) <sub>6</sub> [V <sub>10</sub> O <sub>28</sub> ]                                                                                                                                                                         | 50                       | 50                | -                 | -                 | -                  | -                  | -                 | -                 | 4    |
| <b>Organic-inorganic-POM:</b>                                                                                                                                                                                                              |                          |                   |                   |                   |                    |                    |                   |                   |      |
| <b>Organoantimony-polyoxotungstate:</b>                                                                                                                                                                                                    |                          |                   |                   |                   |                    |                    |                   |                   |      |
| (NH <sub>4</sub> ) <sub>12</sub> [(PhSb <sup>III</sup> ) <sub>4</sub> (A- $\alpha$ -Ge <sup>IV</sup> W <sub>9</sub> O <sub>34</sub> ) <sub>2</sub> ]                                                                                       | -                        | 80                | 40-80             | -                 | -                  | -                  | -                 | -                 | 7    |
| Rb <sub>9</sub> Na[(PhSb <sup>III</sup> ) <sub>4</sub> (A- $\alpha$ -P <sup>V</sup> W <sub>9</sub> O <sub>34</sub> ) <sub>2</sub> ]                                                                                                        | -                        | 110               | 50                | -                 | -                  | -                  | -                 | -                 | 7    |
| Rb <sub>3</sub> {[2-(Me <sub>2</sub> NCH <sub>2</sub> C <sub>6</sub> H <sub>4</sub> )Sb <sup>III</sup> ] <sub>3</sub> (B- $\alpha$ -As <sup>III</sup> W <sub>9</sub> O <sub>33</sub> )}                                                    | -                        | 130               | 60                | -                 | -                  | -                  | -                 | -                 | 7    |
| Cs <sub>3</sub> K <sub>3.5</sub> Na <sub>4.5</sub> [(PhSb <sup>III</sup> ) <sub>4</sub> (Na(H <sub>2</sub> O))As <sup>III</sup> <sub>2</sub> W <sub>19</sub> O <sub>67</sub> (H <sub>2</sub> O)]                                           | -                        | 500               | 125               | -                 | 250                | 125                | 125               | 250               | 8    |
| Cs <sub>4.5</sub> K <sub>5.5</sub> [(PhSb <sup>III</sup> ) <sub>2</sub> As <sup>III</sup> <sub>2</sub> W <sub>19</sub> O <sub>67</sub> (H <sub>2</sub> O)]                                                                                 | -                        | 250               | 62.5              | -                 | 125                | 62.5               | 62.5              | 250               | 8    |
| Cs <sub>4.5</sub> Na <sub>7.5</sub> [(PhSb <sup>III</sup> ) <sub>3</sub> (B- $\alpha$ -As <sup>III</sup> W <sub>9</sub> O <sub>33</sub> ) <sub>2</sub> ]                                                                                   | -                        | 125               | 62.5              | -                 | 62.5               | 31.3               | 15.6              | <7.8              | 8    |
| Cs <sub>6.5</sub> Na <sub>3.5</sub> [(PhSb <sup>III</sup> ) <sub>4</sub> (A- $\alpha$ -As <sup>V</sup> W <sub>9</sub> O <sub>34</sub> ) <sub>2</sub> ]                                                                                     | -                        | 62.5              | 15.6              | -                 | 15.6               | 15.6               | <7.8              | <7.8              | 9    |
| Rb <sub>9.25</sub> Na <sub>0.75</sub> [(OHSb <sup>III</sup> ) <sub>4</sub> (A- $\alpha$ -As <sup>V</sup> W <sub>9</sub> O <sub>34</sub> ) <sub>2</sub> ]                                                                                   | -                        | 1000              | 250               | -                 | 1000               | 1000               | 1000              | 125               | 9    |
| Cs <sub>3</sub> KNa <sub>6</sub> [Na{2-(Me <sub>2</sub> HN <sup>+</sup> CH <sub>2</sub> )C <sub>6</sub> H <sub>4</sub> Sb <sup>III</sup> }As <sup>III</sup> <sub>2</sub> W <sub>19</sub> O <sub>67</sub> (H <sub>2</sub> O)]               | -                        | 1000              | 250               | -                 | 500                | 250                | 500               | 500               | 10   |
| Rb <sub>2.5</sub> K <sub>5.5</sub> {[2-(Me <sub>2</sub> HN <sup>+</sup> CH <sub>2</sub> )C <sub>6</sub> H <sub>4</sub> Sb <sup>III</sup> ] <sub>2</sub> As <sup>III</sup> <sub>2</sub> W <sub>19</sub> O <sub>67</sub> (H <sub>2</sub> O)] | -                        | 500               | 250               | -                 | 250                | 250                | 1000              | 250               | 10   |
| <b>Quinolone-based drug-POM:</b>                                                                                                                                                                                                           |                          |                   |                   |                   |                    |                    |                   |                   |      |
| [Co <sup>II</sup> (C <sub>19</sub> FH <sub>22</sub> N <sub>3</sub> O <sub>4</sub> ) <sub>3</sub> ][C <sub>19</sub> FH <sub>23</sub> N <sub>3</sub> O <sub>4</sub> ][HSiW <sub>12</sub> O <sub>40</sub> ]                                   | 2.52                     | 2.42              | -                 | -                 | -                  | -                  | -                 | -                 | 11   |
| <b>Nanocomposite:</b>                                                                                                                                                                                                                      |                          |                   |                   |                   |                    |                    |                   |                   |      |
| <b>Bamboo charcoal-POM:</b>                                                                                                                                                                                                                |                          |                   |                   |                   |                    |                    |                   |                   |      |
| BC/POM <sup>[i]</sup>                                                                                                                                                                                                                      | 4                        | 4                 | 4                 | 4                 | -                  | -                  | -                 | -                 | 12   |
| <b>Polymer-POM:</b>                                                                                                                                                                                                                        |                          |                   |                   |                   |                    |                    |                   |                   |      |
| <b>PVA/PEI-POM:</b>                                                                                                                                                                                                                        |                          |                   |                   |                   |                    |                    |                   |                   |      |
| PVA-PEI-H <sub>5</sub> PV <sub>2</sub> Mo <sub>10</sub> O <sub>40</sub> <sup>[i]</sup>                                                                                                                                                     | 0.02                     | 2                 | 0.2               | 0.2               | -                  | -                  | -                 | -                 | 13   |
| <b>Chitosan-POM:</b>                                                                                                                                                                                                                       |                          |                   |                   |                   |                    |                    |                   |                   |      |
| CTS-Ca <sub>3</sub> V <sub>10</sub> O <sub>28</sub>                                                                                                                                                                                        | 12.5                     | 12.5              | -                 | -                 | -                  | -                  | -                 | -                 | 4    |
| <b>Polyoxometalate ionic liquids:</b>                                                                                                                                                                                                      |                          |                   |                   |                   |                    |                    |                   |                   |      |
| [N(C <sub>6</sub> H <sub>13</sub> ) <sub>4</sub> ] <sub>8</sub> [ $\alpha$ -SiW <sub>11</sub> O <sub>39</sub> ]                                                                                                                            | 10                       | 1000              | -                 | 1000              | -                  | -                  | -                 | -                 | 14   |
| [N(C <sub>7</sub> H <sub>15</sub> ) <sub>4</sub> ] <sub>8</sub> [ $\alpha$ -SiW <sub>11</sub> O <sub>39</sub> ]                                                                                                                            | 2                        | 25                | -                 | 100               | -                  | -                  | -                 | -                 | 14   |
| [N(C <sub>8</sub> H <sub>17</sub> ) <sub>4</sub> ] <sub>8</sub> [ $\alpha$ -SiW <sub>11</sub> O <sub>39</sub> ]                                                                                                                            | 5                        | 50                | -                 | 100               | -                  | -                  | -                 | -                 | 14   |

<sup>[a]</sup> *S. aureus* (no further information about the exact strain). <sup>[b]</sup> *E. coli* (partially the JM109 strain was used, which is resistant towards nalidixic acid but provided similar/same results as the DH5 $\alpha$  strain). <sup>[c]</sup> *B. subtilis* (no further information about the exact strain). <sup>[d]</sup> *P. aeruginosa* (no further information about the exact strain). <sup>[e]</sup> *Paenibacillus* sp. (no further information about the exact strain). <sup>[f]</sup> *Vibrio* sp. Gal12. <sup>[g]</sup> *P. putida* DSM291. <sup>[h]</sup> *C. michiganensis* (no further information about the exact strain). <sup>[i]</sup> A series of these nanocomposites differing in POM concentration (within the matrix) were tested and only the result of the highest POM concentration is shown (BC/POM ratio = 1:3 and PVA-PEI/POM ratio = 1:10).

## 2. Figures

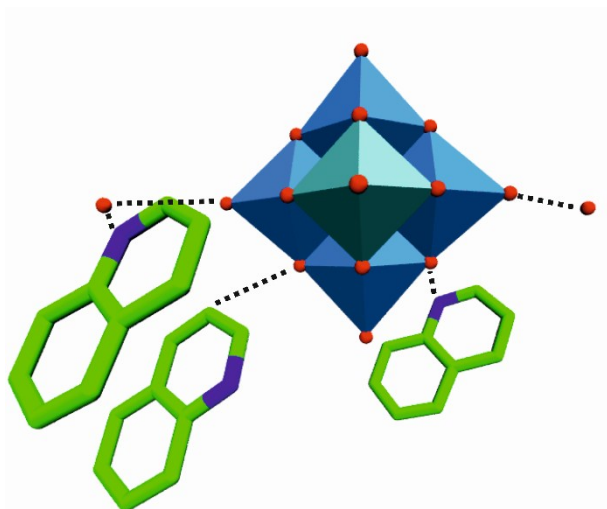

**Fig. S1** Structure of  $(C_9H_8N)_3[NbW_5O_{19}]$ . Structure of the organic-inorganic hybrid is shown, with the POM  $[NbW_5O_{19}]^{3-}$  being represented as polyhedra and the organic quinolinium cations as ball and stick. Color code: Tungsten, blue; niobium, cyan; carbon, green; nitrogen, dark blue; oxygen, red. Dashed lines indicate hydrogen-bonds between the inorganic and organic entities.

## 3. Structure-activity graphs

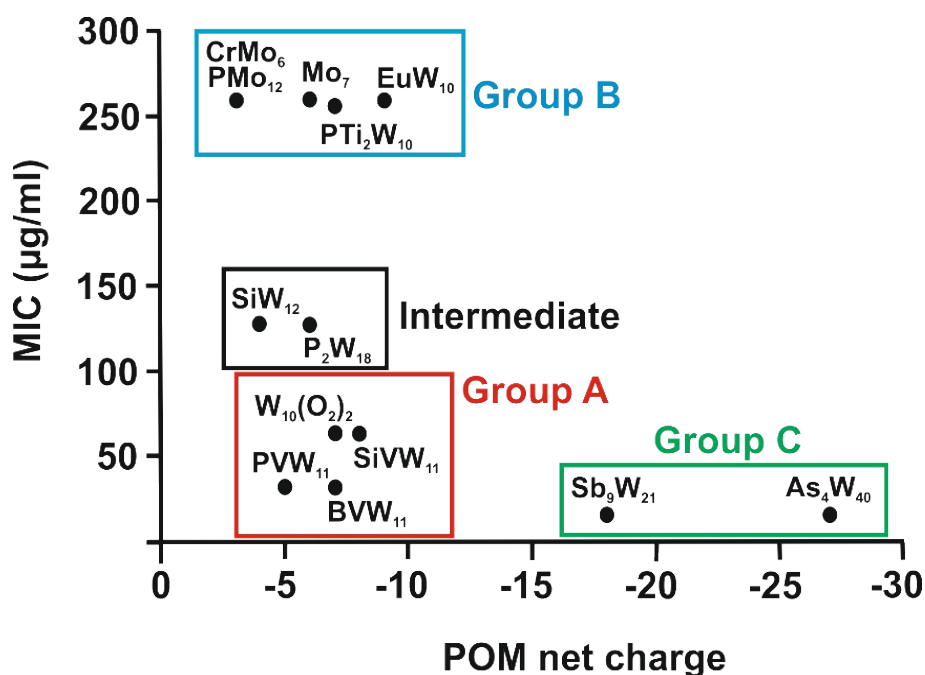

**Fig. S2** Charge-activity-relationship of POMs against the 10 drug susceptible strains of *Helicobacter pylori*. The net charge of the POMs is plotted against their MIC values. Specific groups are marked, namely group A (red) of POMs with higher activity (MIC up to 100 µg/ml), group B (blue) of POMs with lower activity (MIC > 200 µg/ml) and group C (green) of large and highly charged POMs exhibiting the highest activity. Please note that the MIC values are average values originating from in total 10 tested drug susceptible strains. Between MIC values of 100 and 200 µg/ml there is an intermediate zone (black) representing moderately active POMs. CrMo<sub>6</sub> = [CrMo<sub>6</sub>O<sub>24</sub>H<sub>6</sub>]<sup>3-</sup>, PMo<sub>12</sub> = [PMo<sub>12</sub>O<sub>40</sub>]<sup>3-</sup>, Mo<sub>7</sub> = [Mo<sub>7</sub>O<sub>24</sub>]<sup>6-</sup>, EuW<sub>10</sub> = [EuW<sub>10</sub>O<sub>36</sub>]<sup>9-</sup>, P<sub>2</sub>W<sub>18</sub> = [P<sub>2</sub>W<sub>18</sub>O<sub>62</sub>]<sup>6-</sup>, PVW<sub>11</sub> = [PVW<sub>11</sub>O<sub>40</sub>]<sup>5-</sup>, PTi<sub>2</sub>W<sub>10</sub> = [PTi<sub>2</sub>W<sub>10</sub>O<sub>40</sub>]<sup>7-</sup>, W<sub>10</sub>(O<sub>2</sub>)<sub>2</sub> = [PTi<sub>2</sub>W<sub>10</sub>O<sub>38</sub>(O<sub>2</sub>)<sub>2</sub>]<sup>7-</sup>, SiW<sub>12</sub> = [SiW<sub>12</sub>O<sub>40</sub>]<sup>4-</sup>, SiVW<sub>11</sub> = [SiVW<sub>11</sub>O<sub>40</sub>]<sup>7-</sup>, BVW<sub>11</sub> = [BVW<sub>11</sub>O<sub>40</sub>]<sup>7-</sup>, Sb<sub>3</sub>W<sub>21</sub> = [KSb<sub>9</sub>W<sub>21</sub>O<sub>86</sub>]<sup>18-</sup>, As<sub>4</sub>W<sub>40</sub> = [KAs<sub>4</sub>W<sub>40</sub>O<sub>140</sub>]<sup>27-</sup>.

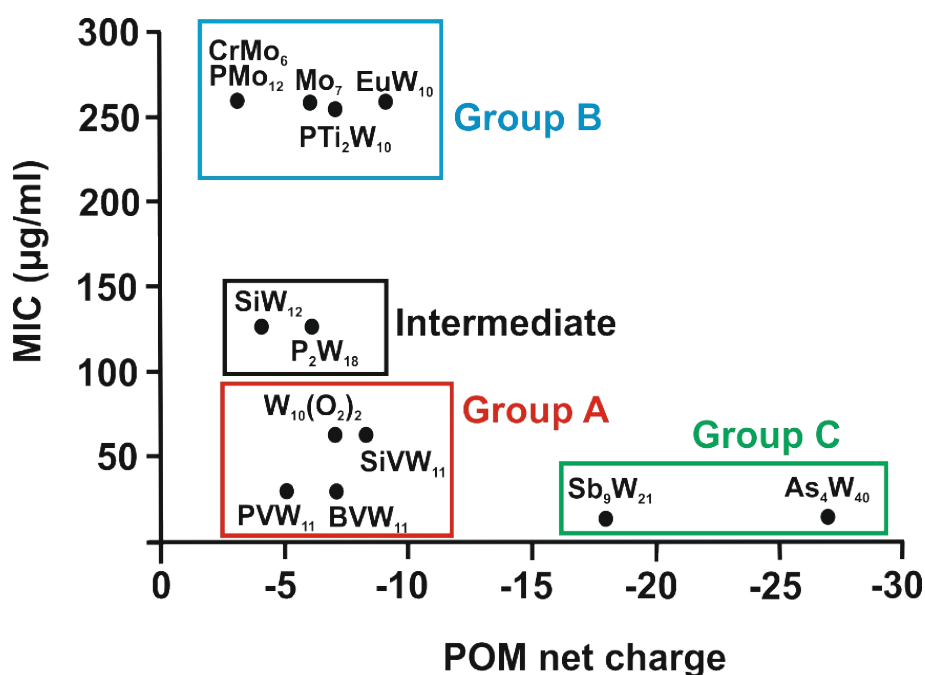

**Fig. S3** Charge-activity-relationship of POMs against the metronidazole-resistant strain Hp018 of *Helicobacter pylori*. The net charge of the POMs is plotted against their MIC values. Specific groups are marked, namely group A (red) of POMs with higher activity (MIC up to 100 µg/ml), group B (blue) of POMs with lower activity (MIC > 200 µg/ml) and group C (green) of large and highly charged POMs exhibiting the highest activity. Between MIC values of 100 and 200 µg/ml there is an intermediate zone (black) representing moderately active POMs. For full POM formula, see caption of Figure S2.

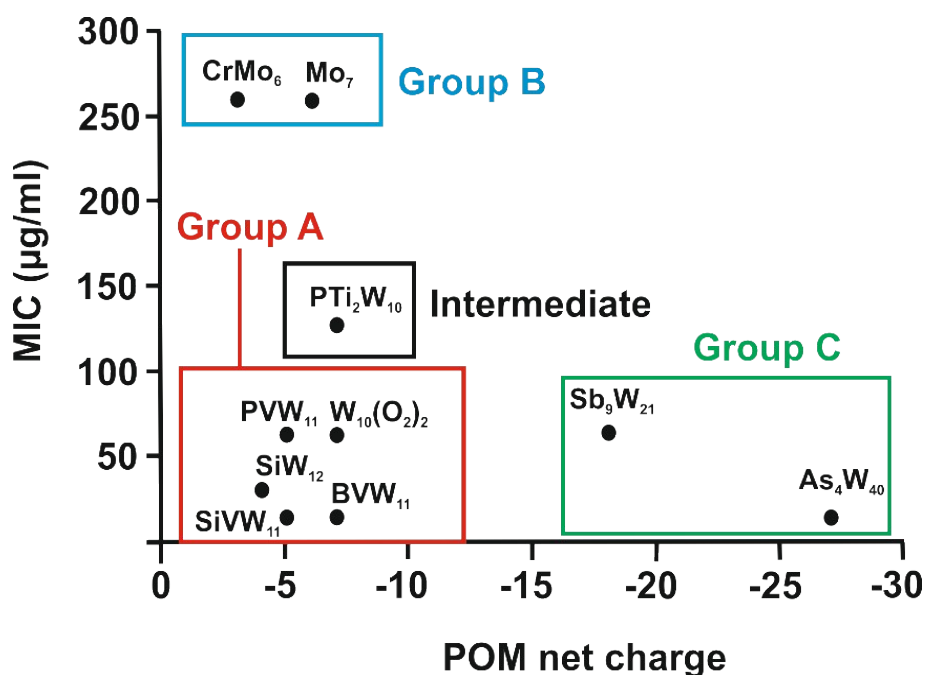

**Fig. S4** Charge-activity-relationship of POMs against the metronidazole-resistant strain Hp030 of *Helicobacter pylori*. The net charge of the POMs is plotted against their MIC values. Specific groups are marked, namely group A (red) of POMs with higher activity (MIC up to 100 µg/ml), group B (blue) of POMs with lower activity (MIC > 200 µg/ml) and group C (green) of large and highly charged POMs exhibiting the highest activity. Between MIC values of 100 and 200 µg/ml there is an intermediate zone (black) representing moderately active POMs. Note that this is the only tested strain, where a group C member (Sb<sub>9</sub>W<sub>21</sub>) exhibits a MIC value > 50 µg/ml. In addition, no data are available for the POMs PMo<sub>12</sub>, EuW<sub>10</sub> and P<sub>2</sub>W<sub>18</sub> against this strain. For full POM formula, see caption of Figure S2.



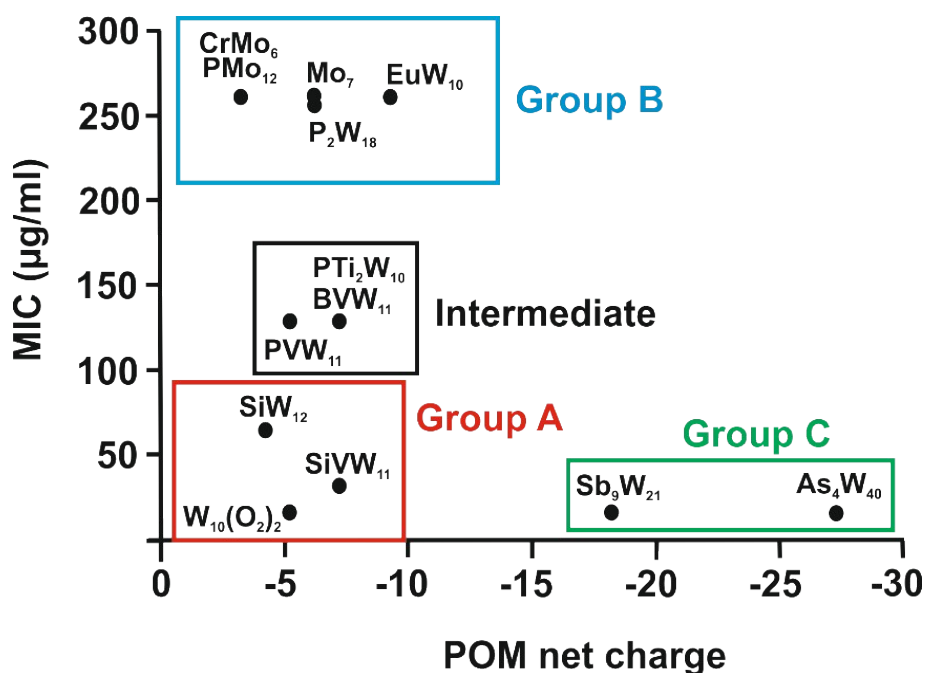

**Fig. S5** Charge-activity-relationship of POMs against the metronidazole-resistant strain Hp065 of *Helicobacter pylori*. The net charge of the POMs is plotted against their MIC values. Specific groups are marked, namely group A (red) of POMs with higher activity (MIC up to 100 µg/ml), group B (blue) of POMs with lower activity (MIC > 200 µg/ml) and group C (green) of large and highly charged POMs exhibiting the highest activity. Between MIC values of 100 and 200 µg/ml there is an intermediate zone (black) representing moderately active POMs. For full POM formula, see caption of Figure S2.

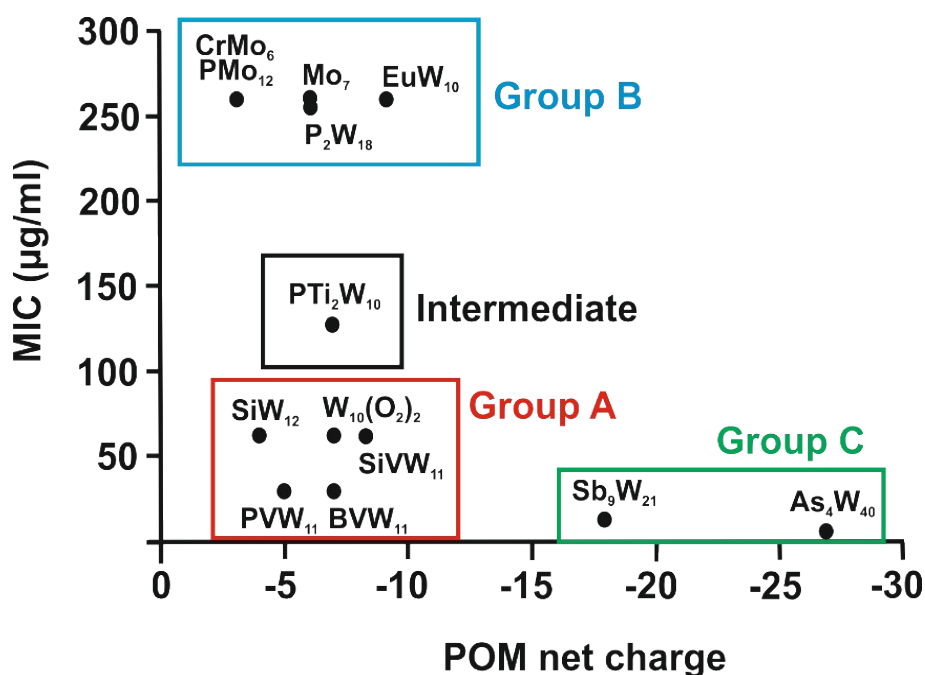

**Fig. S6** Charge-activity-relationship of POMs against the metronidazole-resistant strain ATCC43504 of *Helicobacter pylori*. The net charge of the POMs is plotted against their MIC values. Specific groups are marked, namely group A (red) of POMs with higher activity (MIC up to 100 µg/ml), group B (blue) of POMs with lower activity (MIC > 200 µg/ml) and group C (green) of large and highly charged POMs exhibiting the highest activity. Between MIC values of 100 and 200 µg/ml there is an intermediate zone (black) representing moderately active POMs. For full POM formula, see caption of Figure S2.

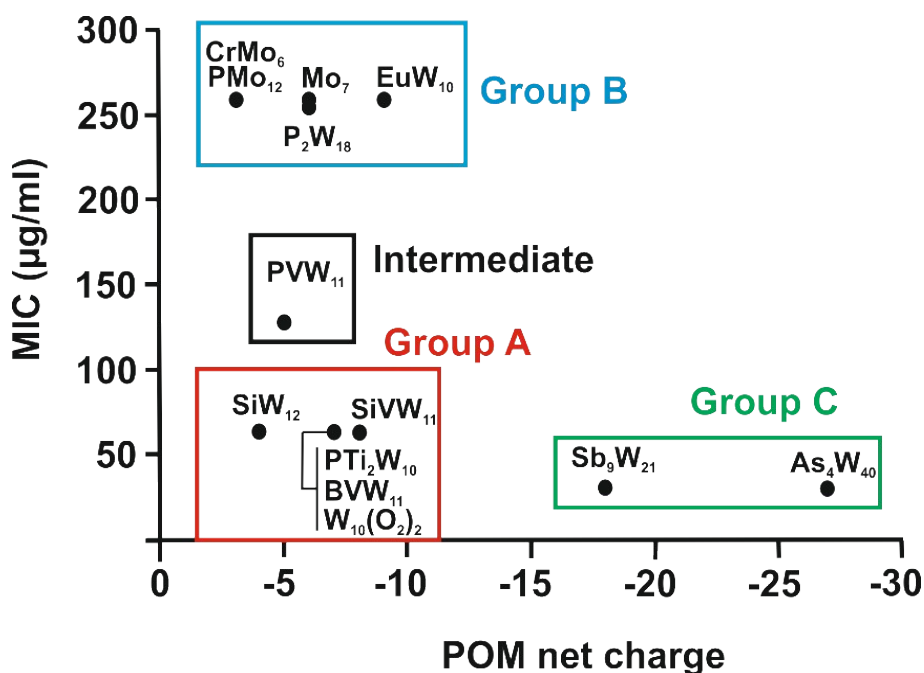

**Fig. S7** Charge-activity-relationship of POMs against the clarithromycin-resistant strain Hp067 of *Helicobacter pylori*. The net charge of the POMs is plotted against their MIC values. Specific groups are marked, namely group A (red) of POMs with higher activity (MIC up to 100 µg/ml), group B (blue) of POMs with lower activity (MIC > 200 µg/ml) and group C (green) of large and highly charged POMs exhibiting the highest activity. Between MIC values of 100 and 200 µg/ml there is an intermediate zone (black) representing moderately active POMs. For full POM formula, see caption of Figure S2.

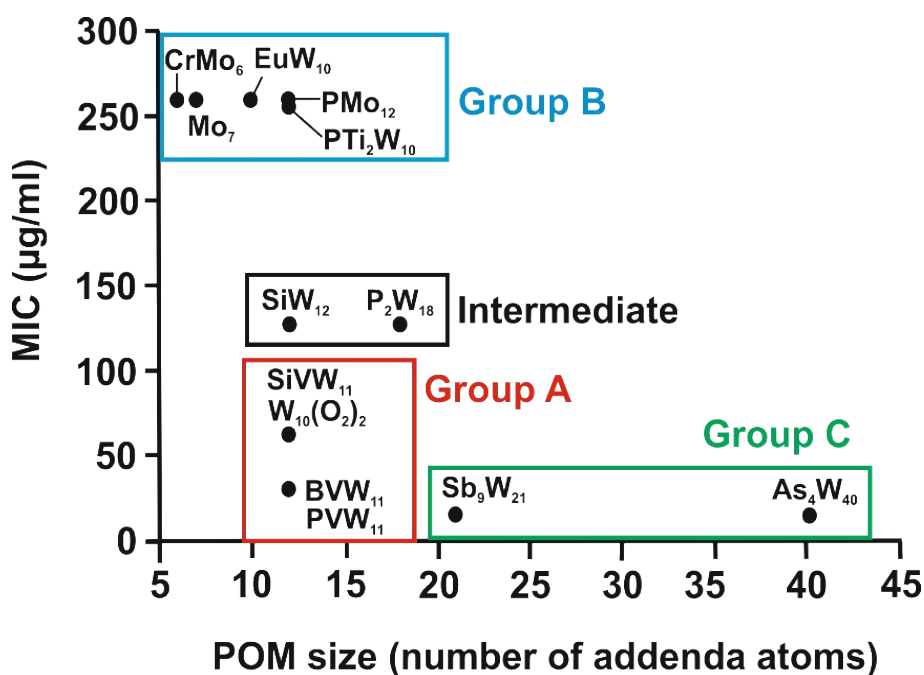

**Fig. S8** Size-activity-relationship of POMs against the 10 drug susceptible strains of *Helicobacter pylori*. The net charge of the POMs expressed as number of addenda atoms is plotted against their MIC values. Specific groups are marked, namely group A (red) of POMs with higher activity (MIC up to 100 µg/ml), group B (blue) of POMs with lower activity (MIC > 200 µg/ml) and group C (green) of large and highly charged POMs exhibiting the highest activity. Between MIC values of 100 and 200 µg/ml there is an intermediate zone (black) representing moderately active POMs. For full POM formula, see caption of Figure S2.

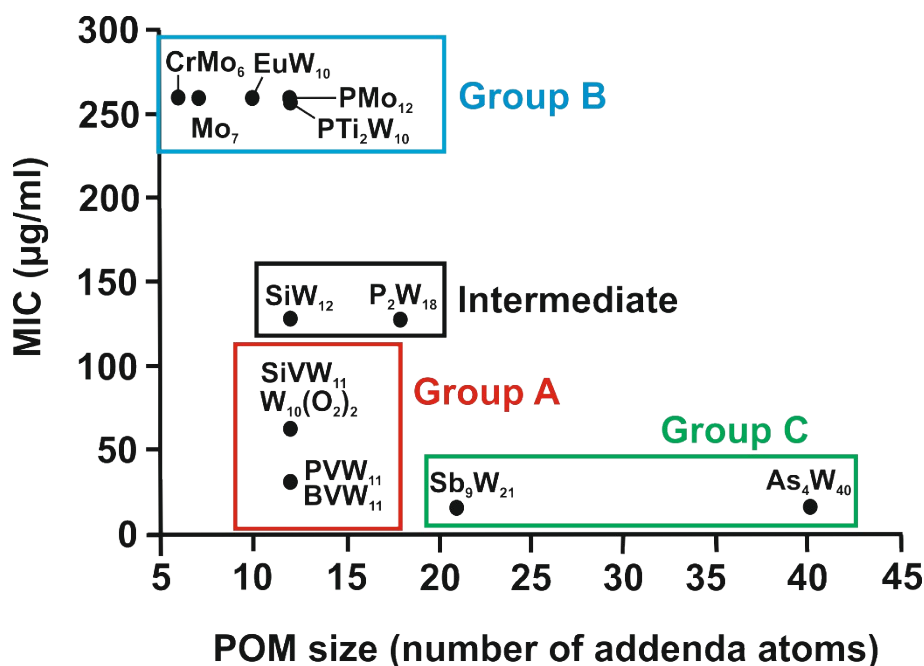

**Fig. S9** Size-activity-relationship of POMs against the metronidazole-resistant strain Hp018 of *Helicobacter pylori*. The net charge of the POMs expressed as number of addenda atoms is plotted against their MIC values. Specific groups are marked, namely group A (red) of POMs with higher activity (MIC up to 100 µg/ml), group B (blue) of POMs with lower activity (MIC > 200 µg/ml) and group C (green) of large and highly charged POMs exhibiting the highest activity. Between MIC values of 100 and 200 µg/ml there is an intermediate zone (black) representing moderately active POMs. For full POM formula, see caption of Figure S2.

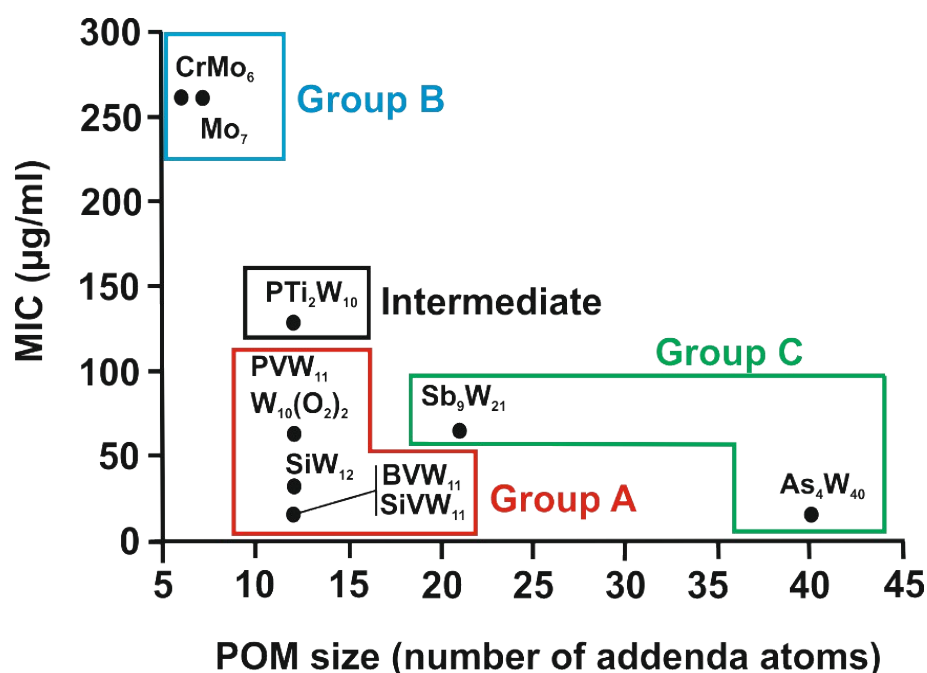

**Fig. S10** Size-activity-relationship of POMs against the metronidazole-resistant strain Hp030 of *Helicobacter pylori*. The net charge of the POMs expressed as number of addenda atoms is plotted against their MIC values. Specific groups are marked, namely group A (red) of POMs with higher activity (MIC up to 100 µg/ml), group B (blue) of POMs with lower activity (MIC > 200 µg/ml) and group C (green) of large and highly charged POMs exhibiting the highest activity. Between MIC values of 100 and 200 µg/ml there is an intermediate zone (black) representing moderately active POMs. Note that this is the only tested strain, where a group C member (Sb<sub>9</sub>W<sub>21</sub>) exhibits a MIC value > 50 µg/ml. In addition, no data are available for the POMs PMo<sub>12</sub>, EuW<sub>10</sub> and P<sub>2</sub>W<sub>18</sub> against this strain. For full POM formula, see caption of Figure S2.

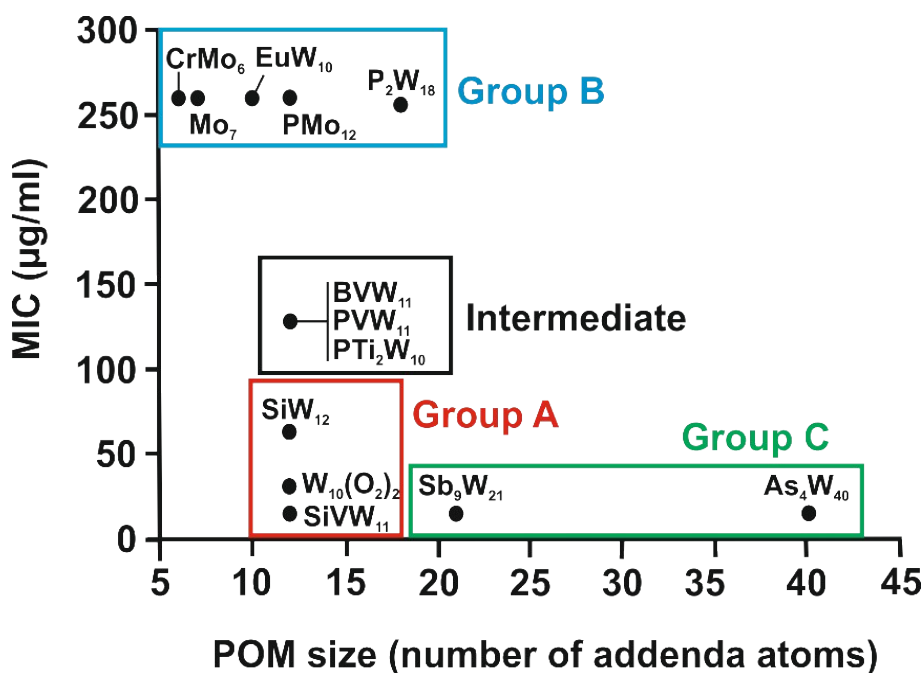

**Fig. S11** Size-activity-relationship of POMs against the metronidazole-resistant strain Hp065 of *Helicobacter pylori*. The net charge of the POMs expressed as number of addenda atoms is plotted against their MIC values. Specific groups are marked, namely group A (red) of POMs with higher activity (MIC up to 100 µg/ml), group B (blue) of POMs with lower activity (MIC > 200 µg/ml) and group C (green) of large and highly charged POMs exhibiting the highest activity. Between MIC values of 100 and 200 µg/ml there is an intermediate zone (black) representing moderately active POMs. For full POM formula, see caption of Figure S2.

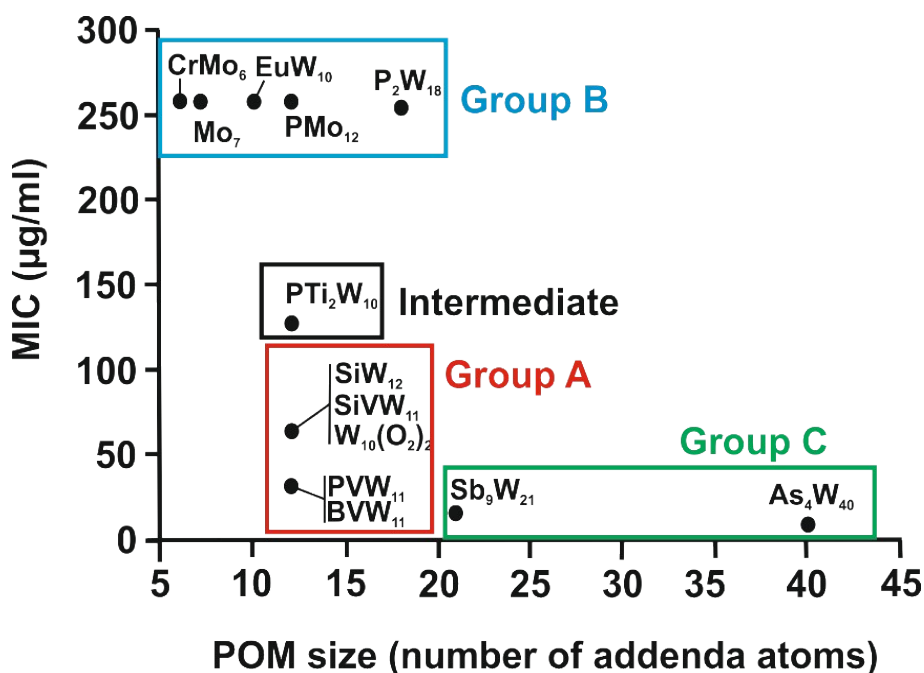

**Fig. S12** Size-activity-relationship of POMs against the metronidazole-resistant strain ATCC43504 of *Helicobacter pylori*. The net charge of the POMs expressed as number of addenda atoms is plotted against their MIC values. Specific groups are marked, namely group A (red) of POMs with higher activity (MIC up to 100 µg/ml), group B (blue) of POMs with lower activity (MIC > 200 µg/ml) and group C (green) of large and highly charged POMs exhibiting the highest activity. Between MIC values of 100 and 200 µg/ml there is an intermediate zone (black) representing moderately active POMs. For full POM formula, see caption of Figure S2.

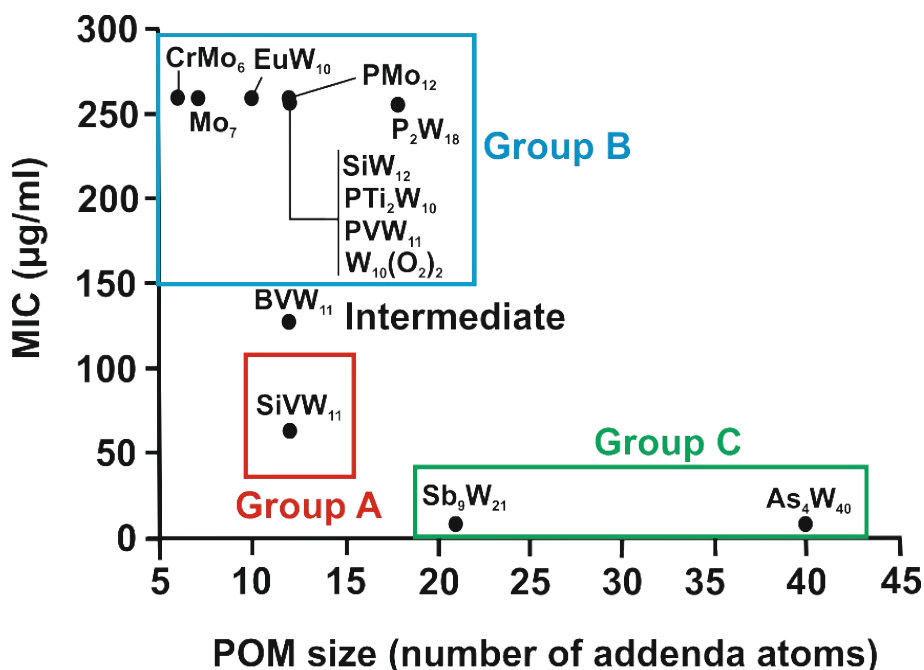

**Fig. S13** Size-activity-relationship of POMs against the clarithromycin-resistant strain Hp027 of *Helicobacter pylori*. The net charge of the POMs expressed as number of addenda atoms is plotted against their MIC values. Specific groups are marked, namely group A (red) of POMs with higher activity (MIC up to 100 µg/ml), group B (blue) of POMs with lower activity (MIC > 200 µg/ml) and group C (green) of large and highly charged POMs exhibiting the highest activity. Between MIC values of 100 and 200 µg/ml there is an intermediate zone representing moderately active POMs (i.e. BVW<sub>11</sub>). For full POM formula, see caption of Figure S2.

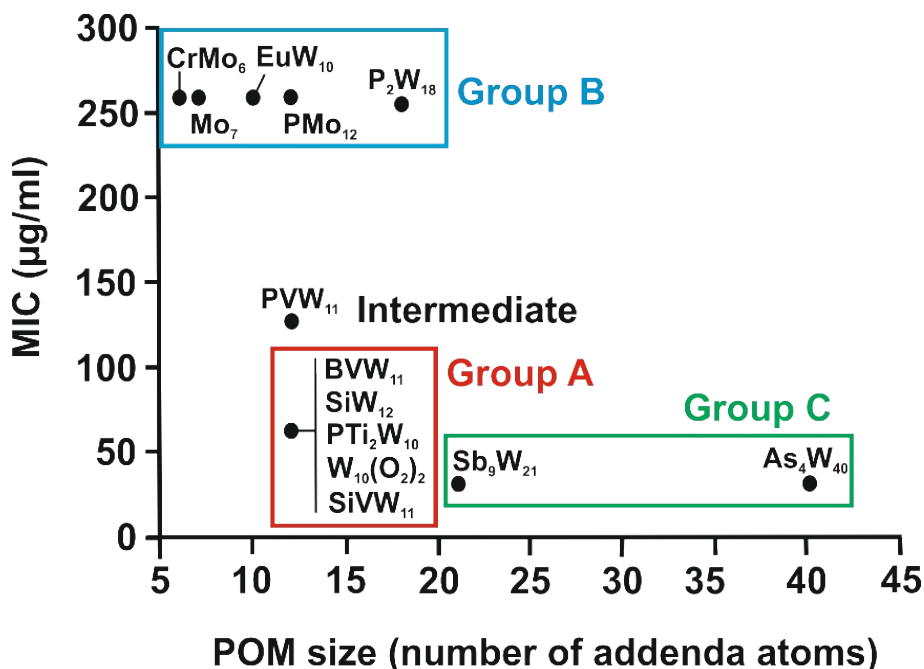

**Fig. S14** Size-activity-relationship of POMs against the clarithromycin-resistant strain Hp067 of *Helicobacter pylori*. The net charge of the POMs expressed as number of addenda atoms is plotted against their MIC values. Specific groups are marked, namely group A (red) of POMs with higher activity (MIC up to 100 µg/ml), group B (blue) of POMs with lower activity (MIC > 200 µg/ml) and group C (green) of large and highly charged POMs exhibiting the highest activity. Between MIC values of 100 and 200 µg/ml there is an intermediate zone representing moderately active POMs (i.e. PVW<sub>11</sub>). For full POM formula, see caption of Figure S2.

## 4. References

- 1 T. Yamase, N. Fukuda and Y. Tajima, *Biol. Pharm. Bull.*, 1996, **19**, 459–465.
- 2 N. Fukuda, T. Yamase and Y. Tajima, *Biol. Pharm. Bull.*, 1999, **22**, 463–470.
- 3 Y. Tajima, *Biomed. Res.*, 2002, **23**, 115–125.
- 4 S. Chen, G. Wu, D. Long and Y. Liu, *Carbohydr. Polym.*, 2006, **64**, 92–97.
- 5 N. Fukuda and T. Yamase, *Biol. Pharm. Bull.*, 1997, **20**, 927–930.
- 6 M. Inoue, T. Suzuki, Y. Fujita, M. Oda, N. Matsumoto and T. Yamase, *J. Inorg. Biochem.*, 2006, **100**, 1225–1233.
- 7 M. Inoue, K. Segawa, S. Matsunaga, N. Matsumoto, M. Oda and T. Yamase, *J. Inorg. Biochem.*, 2005, **99**, 1023–1031.
- 8 M. Barsukova-Stuckart, L. F. Piedra-Garza, B. Gautam, G. Alfaro-Espinoza, N. V. Izarova, A. Banerjee, B. S. Bassil, M. S. Ullrich, H. J. Breunig, C. Silvestru and U. Kortz, *Inorg. Chem.*, 2012, **51**, 12015–12022.
- 9 P. Yang, B. S. Bassil, Z. Lin, A. Haider, G. Alfaro-Espinoza, M. S. Ullrich, C. Silvestru and U. Kortz, *Chem. – Eur. J.*, 2015, **21**, 15600–15606.
- 10 P. Yang, Z. Lin, B. S. Bassil, G. Alfaro-Espinoza, M. S. Ullrich, M.-X. Li, C. Silvestru and U. Kortz, *Inorg. Chem.*, 2016, **55**, 3718–3720.
- 11 P. Yang, Z. Lin, G. Alfaro-Espinoza, M. S. Ullrich, C. I. Raț, C. Silvestru and U. Kortz, *Inorg. Chem.*, 2016, **55**, 251–258.
- 12 H. Liu, Y.-L. Zou, L. Zhang, J.-X. Liu, C.-Y. Song, D.-F. Chai, G.-G. Gao and Y.-F. Qiu, *J. Coord. Chem.*, 2014, **67**, 2257–2270.
- 13 F.-C. Yang, K.-H. Wu, W.-P. Lin and M.-K. Hu, *Microporous Mesoporous Mater.*, 2009, **118**, 467–472.
- 14 K.-H. Wu, P. Y. Yu, C. C. Yang, G. P. Wang and C. M. Chao, *Polym. Degrad. Stab.*, 2009, **94**, 1411–1418.
- 15 A.-L. Kubo, L. Kremer, S. Herrmann, S. G. Mitchell, O. M. Bondarenko, A. Kahru and C. Streb, *ChemPlusChem*, 2017, **82**, 867–871.
